# Supplementary material for: Usability Testing of a Web Tool for Dissemination and Implementation Science Models
Source: PubMed Central journal article supplement (PMC11415461; doi:10.1007/s43477-024-00125-7), 2024-06-14
Supplement: 43477_2024_125_MOESM5_ESM.pdf [file 43477_2024_125_MOESM5_ESM.pdf]

# Explore D&I Models

You can search for D&I Models by entering a keyword OR by selecting from the categories below.

| Model                                                                                                                                  | D &/or I | Socio-Ecological Levels                                     | Field of Origin             | Times Cited |
|----------------------------------------------------------------------------------------------------------------------------------------|----------|-------------------------------------------------------------|-----------------------------|-------------|
| A Model for Evidence-Based Practice                                                                                                    |          |                                                             |                             |             |
| ACE Star Model of Knowledge Transformation                                                                                             | D>I      | Individual<br>Organization<br>Community                     | Nursing                     | 44          |
| Active Implementation Framework                                                                                                        | I-Only   | Individual<br>Organization<br>Community                     | Education                   | 1870        |
| Adaptation in dissemination and implementation science                                                                                 | I-Only   | Individual<br>Organization<br>Community<br>System           | Health Disparities          | 39          |
| Adherence Optimization Framework                                                                                                       | I-Only   | Individual<br>Organization<br>Community<br>System           | Sports Injury<br>Prevention | 14          |
| Advancing health disparities research within the health care system                                                                    | D>I      | Organization<br>Community<br>System                         | Health Disparities          | 174         |
| Advancing Research and Clinical Practice through Close Collaboration (ARCC) Model of Evidence-Based Practice in Nursing and Healthcare | D>I      | Individual<br>Organization                                  | Nursing                     | 1680        |
| Availability, Responsiveness & Continuity (ARC): An Organizational & Community Intervention Model                                      | I-Only   | Organization<br>Community                                   | Mental health               | 100         |
| Behaviour Change Wheel                                                                                                                 | D>I      | Individual<br>Organization<br>Community<br>System<br>Policy | Health Psychology           | 2430        |
